# Supplementary material
Source: PubMed Central journal article supplement (PMC8091573)
Supplement: NIHMS1693997-supplement-supplemental_material.pdf [file NIHMS1693997-supplement-supplemental_material.pdf]

## **SUPPLEMENTAL MATERIAL**

### **Tracking Cardiac Rehabilitation Participation and Completion among Medicare Beneficiaries to Inform the Efforts of a National Initiative**

**Authors:** Matthew Ritchey, Sha Maresh, Jessica McNeely, Thomas Shaffer, Sandra Jackson, Steven Keteyian, Clinton Brawner, Mary Whooley, Tiffany Chang, Haley Stolp, Linda Schieb, Janet Wright

## Supplemental Methods

Medicare fee-for-service beneficiaries without a primary qualifying event were considered cardiac rehabilitation- (CR) eligible if they had documented current stable angina pectoris (angina) or stable, chronic heart failure (heart failure) during 2016 (referred to collectively as “secondary qualifying events”). The procedures outlined below were used to identify CR-eligible beneficiaries based on having one of the secondary qualifying events and to establish the index date for beginning to assess the CR-related measures described in the main paper. Beneficiaries could be identified as being CR-eligible based on both secondary qualifying event types; therefore, the totals are not mutually exclusive.

### ***Defining and measuring cardiac rehabilitation use for beneficiaries with stable angina.***

Angina was defined as having a specified International Classification of Disease, Tenth Revision, Clinical Modification (ICD-10-CM) diagnosis code (any location) on  $\geq 2$  outpatient claims (See Supplemental Table). The eligibility date started on the date of the first angina-related claim identified.

### ***Defining and measuring cardiac rehabilitation use for beneficiaries with heart failure.***

Heart failure was defined in two ways in an attempt to capture beneficiaries who met Medicare’s clinical criteria for being eligible to received CR services: have a left ventricular ejection fraction  $\leq 35\%$  and New York Heart Association functional class II to IV with no recent ( $\leq 6$  weeks) or planned ( $\leq 6$  months) major cardiovascular disease (CVD)-related hospitalizations/procedures.<sup>1</sup>

First, *diagnosis-based heart failure* was defined as having a specified ICD-10-CM code (any location) on  $\geq 2$  outpatient claims for chronic systolic heart failure or chronic systolic/diastolic heart failure (Supplemental Table). First, a 6 week lookback from the date of the first outpatient heart failure encounter was conducted to see if a CVD-related inpatient hospitalization occurred, defined as a primary or second listed ICD-10-CM diagnosis code of I00-I78. If no CVD hospitalization occurred, we started the CR measurement period immediately from the day of the first heart failure-related outpatient encounter. If one did occur, we started the CR measurement period once CR use began or 6 weeks after discharge from the CVD-related hospitalization (whichever occurred first). If another CVD-related hospitalization occurred

during the 6 weeks after discharge, we repeated the process until a 6-week window without a CVD-related hospitalization occurred or CR was initiated. If the calendar year ended without the CR initiation assessment period beginning, the final 6-week assessment was continued into the following year, but no additional 6-week window assessments were performed in the new year. If an assessment for CR initiation could not be performed because the patient had another CVD hospitalization during that final 6-week assessment that continued into the new calendar year, that beneficiary was removed from the CR eligible population count. If no CVD hospitalization occurred, we started the CR measurement period immediately from the day of the first heart failure-related outpatient encounter. If the beneficiary first had an *inpatient* claim in any place with one of the two heart failure indication codes, we started the CR measurement period once CR use began or 6 weeks after the discharge from that hospitalization even if it extended into the following year (whichever occurred first), unless a CVD-related hospitalization (first or second listed diagnosis ICD-10 code I00-I78) occurred during that 6-week period. If a CVD-related hospitalization did occur, we followed the process specified above.

Second, *procedure-based heart failure* was defined as having a specified ICD-10-CM procedure code during any inpatient encounter or Current Procedural Terminology (CPT) code in an inpatient or outpatient encounter for either insertion of an implantable ventricular assist device (VAD) or bi-ventricular pacemaker (BiV pacer). We started the CR measurement period once CR use began or 6 weeks after the procedure date (whichever occurred first), unless a CVD-related hospitalization (first or second listed diagnosis ICD-10 code I00-I78) occurred during that 6-week period. If a CVD-related hospitalization did occur, we followed the process specified above.

**Supplemental Table. Diagnosis and Procedural Codes\* Used to Identify Cardiac Rehabilitation-qualifying Events**

| <b>Primary Cardiac Rehabilitation Qualifying Event Surveillance</b>                                                                                                                                                                                        |                                                                                                                                                                        |
|------------------------------------------------------------------------------------------------------------------------------------------------------------------------------------------------------------------------------------------------------------|------------------------------------------------------------------------------------------------------------------------------------------------------------------------|
| <b>Acute Myocardial Infarction</b>                                                                                                                                                                                                                         |                                                                                                                                                                        |
| <b>ICD-10-CM Diagnosis Codes</b>                                                                                                                                                                                                                           |                                                                                                                                                                        |
| I21.0, I21.01, I21.02, I21.09 , I21.1, I21.11, I21.19, I21.2, I21.21, I21.29, I21.3, I21.4, I21.9, I21.A1 <sup>†</sup> , I21.A9 <sup>†</sup> , I22.0, I22.1, I22.2, I22.8, I22.9                                                                           |                                                                                                                                                                        |
| <b>Coronary artery bypass surgery (CABG)</b>                                                                                                                                                                                                               |                                                                                                                                                                        |
| <b>ICD-10-CM Procedural Codes</b>                                                                                                                                                                                                                          | <b>CPT Codes</b>                                                                                                                                                       |
| 0210X, 0211X, 0212X, 0213X                                                                                                                                                                                                                                 | 33510, 33511, 33512, 33513, 33514, 33516, 33517, 33518, 33519, 33521, 33522, 33523, 33530, 33533, 33534, 33535, 33536, 33572, 35600, S2205, S2206, S2207, S2208, S2209 |
| <b>Valve Repair/Replacement Procedures</b>                                                                                                                                                                                                                 |                                                                                                                                                                        |
| <b>ICD-10-CM Procedural Codes (includes all codes with these as the first four identifiers)</b>                                                                                                                                                            | <b>CPT Codes</b>                                                                                                                                                       |
| 027F, 027G, 027H, 027J, 02CF, 02CG, 02CH, 02CJ, 02NF, 02NG, 02NH, 02NJ, 02QF, 02QG, 02QH, 02QJ, 02RF, 02RG, 02RH, 02RJ, 02TH, 02VG, 02UF, 02UG, 02UH, 02UJ                                                                                                 | 33361-33417, 33418-33430, 33460-33468, 33470-33478                                                                                                                     |
| <b>Percutaneous transluminal coronary angioplasty (PTCA) or coronary stenting</b>                                                                                                                                                                          |                                                                                                                                                                        |
| <b>ICD-10-CM Procedural Codes</b>                                                                                                                                                                                                                          | <b>CPT Codes</b>                                                                                                                                                       |
| 02703ZZ, 02704ZZ, 02713ZZ, 02714ZZ, 02723ZZ, 02724ZZ, 02733ZZ, 02734ZZ, 3E07017, 3E070PZ, 3E07317, 3E073PZ, 02700ZZ, 02710ZZ, 02720ZZ, 02730ZZ, 02C00ZZ, 02C10ZZ, 02C20ZZ, 02C30ZZ, 02C03ZZ, 02C04ZZ, 02C13ZZ, 02C14ZZ, 02C23ZZ, 02C24ZZ, 02C33ZZ, 02C34ZZ | 92920, 92921, 92924, 92925, 92928, 92929, 92933, 92934, 92937, 92938, 92941, 92943, 92944, 92973, 92974                                                                |
| <b>Heart or heart-lung transplant</b>                                                                                                                                                                                                                      |                                                                                                                                                                        |
| <b>ICD-10-CM Procedural Codes</b>                                                                                                                                                                                                                          | <b>CPT Codes</b>                                                                                                                                                       |
| 02YA0Z0, 02YA0Z1, 02YA0Z2, 0BYM0Z0, 0BYM0Z1, 0BYM0Z2, 02YA0Z0 , 02YA0Z1, 02YA0Z2, 02RK0JZ, 02RL0JZ, 02WA0JZ, 02WA0JZ                                                                                                                                       | 33945, 33927, 33928, 0051T, 0052T, 0053T                                                                                                                               |
| <b>Secondary Cardiac Rehabilitation Qualifying Event Surveillance</b>                                                                                                                                                                                      |                                                                                                                                                                        |
| <b>Current stable angina pectoris</b>                                                                                                                                                                                                                      |                                                                                                                                                                        |
| <b>ICD-10-CM Diagnosis Codes</b>                                                                                                                                                                                                                           |                                                                                                                                                                        |
| I20.1, I20.8, I20.9                                                                                                                                                                                                                                        |                                                                                                                                                                        |
| <b>Stable*, chronic heart failure (LVEF ≤35% and NYHA class II to IV)</b>                                                                                                                                                                                  |                                                                                                                                                                        |
| <b>ICD-10-CM Diagnosis Codes</b>                                                                                                                                                                                                                           |                                                                                                                                                                        |
| I50.22, I50.42, I50.82 <sup>†</sup>                                                                                                                                                                                                                        |                                                                                                                                                                        |
| <b>Procedures related to chronic heart failure management</b>                                                                                                                                                                                              |                                                                                                                                                                        |
| <b>Implantable (intracorporeal) ventricular assist device insertion</b>                                                                                                                                                                                    |                                                                                                                                                                        |
| <b>ICD-10-CM Procedure Codes</b>                                                                                                                                                                                                                           | <b>CPT Codes</b>                                                                                                                                                       |
| 02HA0QZ                                                                                                                                                                                                                                                    | 33979                                                                                                                                                                  |
| <b>Bi-ventricular pacemaker insertion</b>                                                                                                                                                                                                                  |                                                                                                                                                                        |
| <b>ICD-10-CM Procedure Codes</b>                                                                                                                                                                                                                           | <b>CPT Codes</b>                                                                                                                                                       |
| 0JH609Z, 0JH639Z, 0JH809Z, 0JH839Z, 0JH607Z, 0JH637Z, 0JH807Z, 0JH837Z                                                                                                                                                                                     | 33224, 33225                                                                                                                                                           |

\*Stable\* defined as no recent (≤6 weeks) or planned (≤6 months) major cardiovascular hospitalizations/ procedures)

<sup>†</sup>Effective Oct. 1, 2017

**Supplemental Figure. Unadjusted cardiac rehabilitation participation (a), timely initiation (b) and completion (c) rates among Medicare Fee-for-service beneficiaries, by hospital referral region and US Census Division, 2016–2017**

**a. Participation ( $\geq 1$  session attended)**

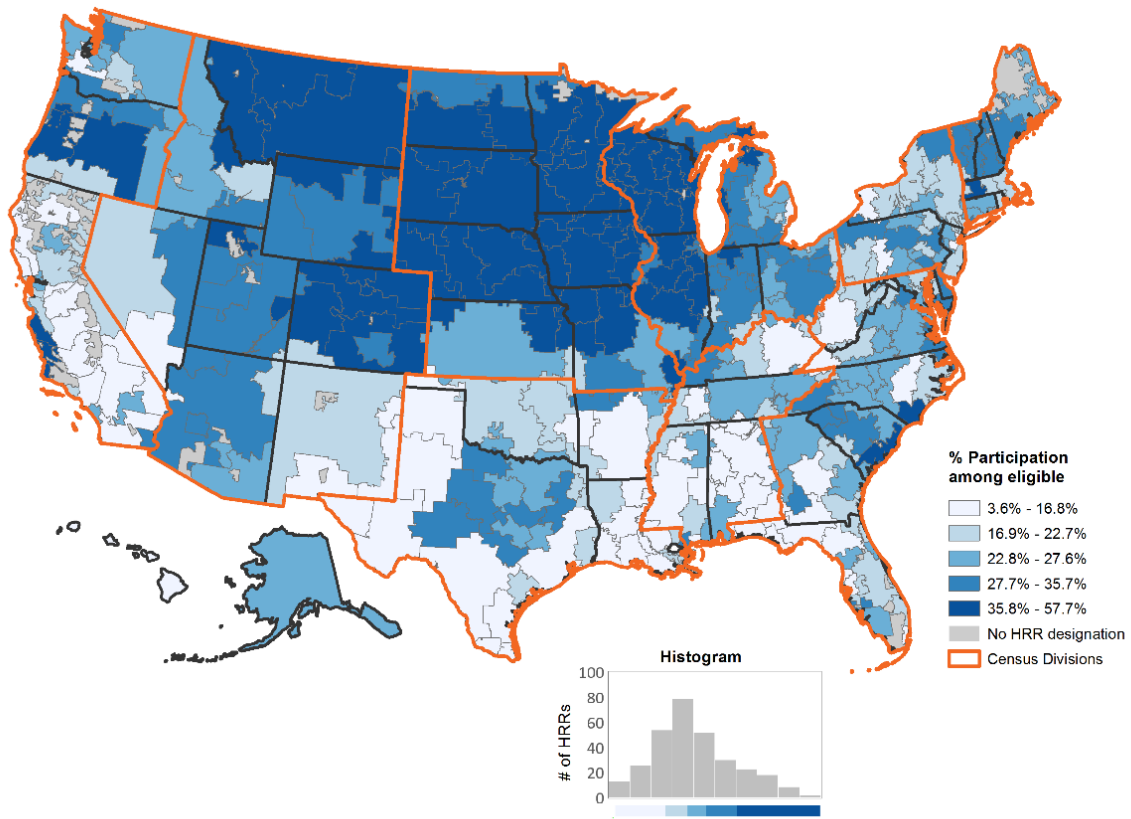

**b. Timely initiation (initiated within 21 days of event)**

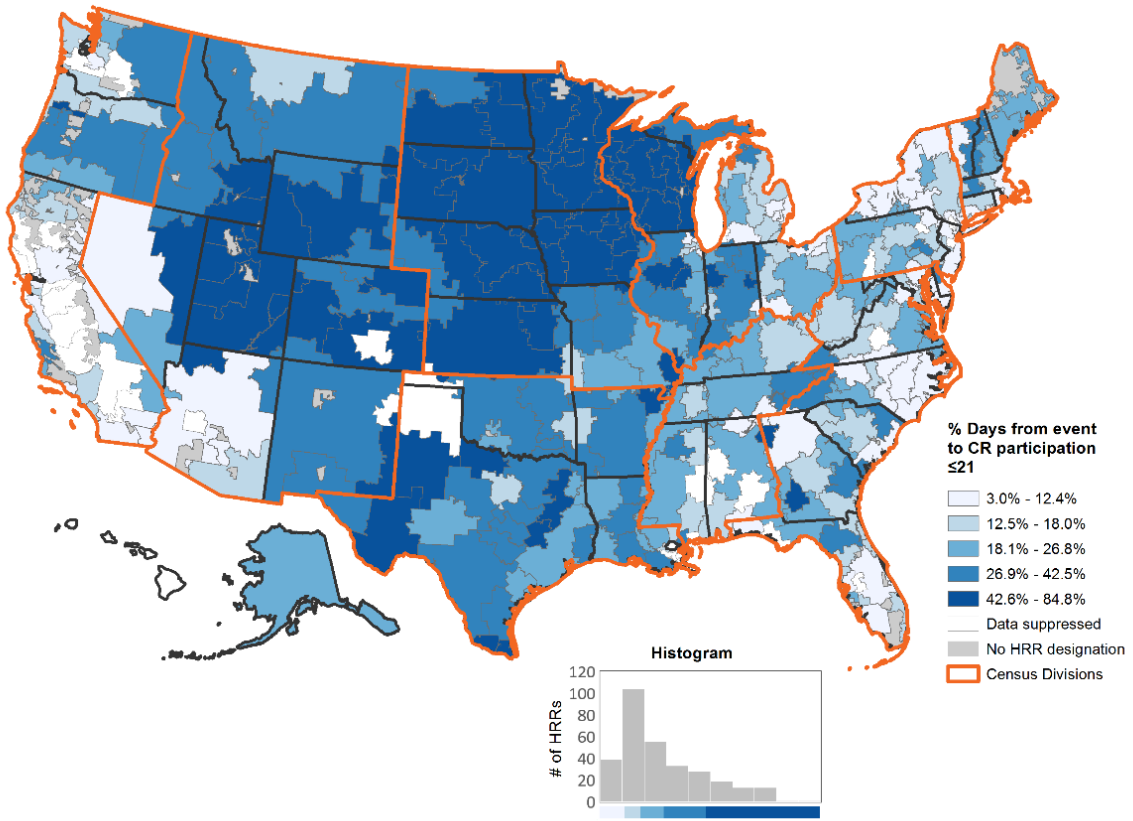

c. Completion (attended  $\geq 36$  sessions)

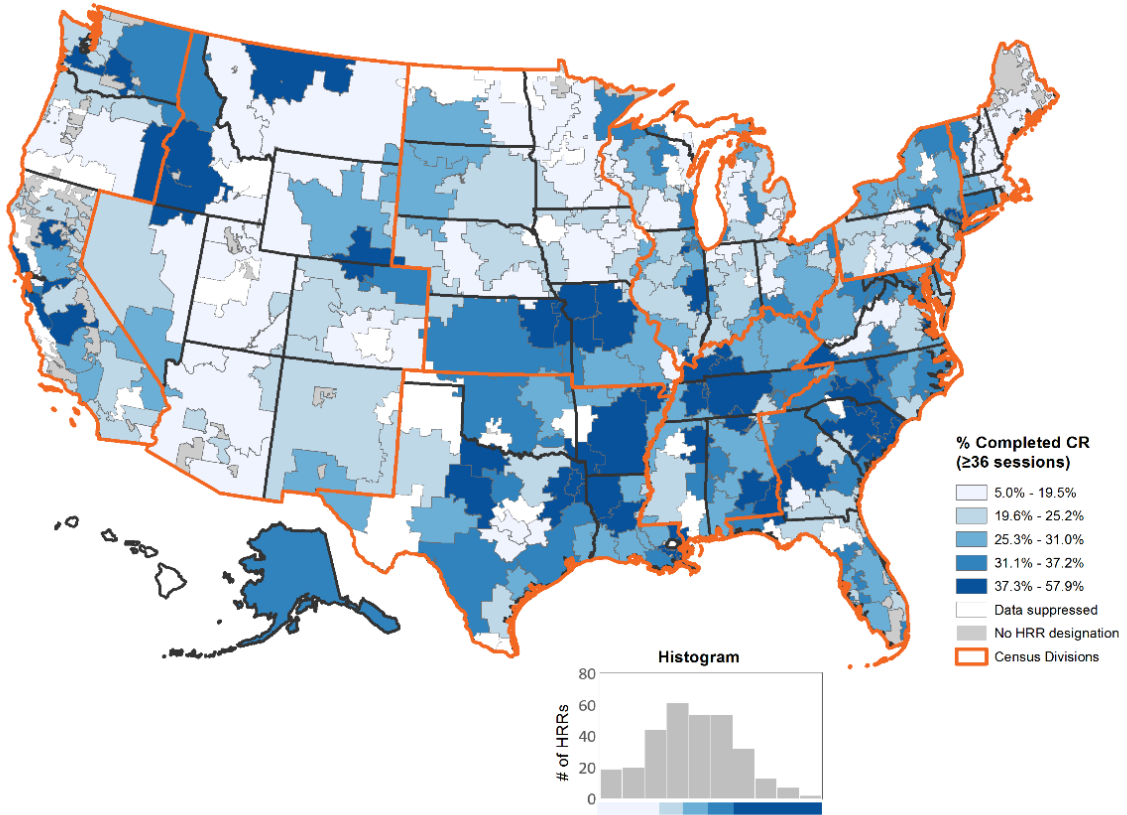

## Supplemental References

1. Centers for Medicare and Medicaid Services. Decision Memo for Cardiac Rehabilitation Programs - Chronic Heart Failure. CAG-00437N. <https://www.cms.gov/medicare-coverage-database/details/nca-decision-memo.aspx?NCAId=270>. Published Feb 18, 2014. Accessed November 11, 2019.
